# Supplementary material for: Self-Assessed Competency among Clinical Research Professionals in the Philippines
Source: Research Square preprint supplement (doi:10.21203/rs.3.rs-5921667/v1), 2025-02-24
Supplement: Supplementary file 1 [file 00ca0ce6dc4f08438a76a4fc.docx]

**Supplementary:**

**Table A. Perceived Relevance and Training Needs of Competency Domains of all participants**

|  | **Relevance (%)** | | | | | **Training Needs** | | | | |
| --- | --- | --- | --- | --- | --- | --- | --- | --- | --- | --- |
| **Competency Domains (N=175)** | **1 - Highly Irrelevant** | **2 - Likely Irrelevant** | **3- More or Less Relevant** | **4 - Likely Relevant** | **5 - Highly Relevant** | **1 - Not at all Necessary** | **2 - Slightly Necessary** | **3-Moderately Necessary** | **4 - Very Necessary** | **5 Extremely Necessary** |
| Domain 1 Scientific Concepts and Research Design | 13  (7.43) | 2  (1.14) | 22  (12.57) | 47  (26.9) | 91  (52.0) | 3  (1.71) | 27  (15.4) | 51  (29.14) | 63  (36.0) | 31  (17.71) |
| Domain 2 Ethical and Participant Safety Considerations | 13  (7.43) | 5  (2.86) | 16  (9.14) | 30  (17.14) | 111  (63.43) | 4  (2.29) | 26  (14.86) | 48  (27.43) | 53  (30.29) | 44  (25.14) |
| Domain 3 Investigational Products Development and Regulation | 8  (4.57) | 14  (8.00) | 43  (24.57) | 53  (30.29) | 57  (32.57) | 5  (2.86) | 18  (10.29) | 60  (34.29) | 64  (36.57) | 28  (16.00) |
| Domain 4 Clinical Study Operations (Good Clinical Practice) | 4  (2.29) | 4  ( 2.29) | 13  (7.43) | 40  (22.86) | 114  (65.14) | 2  (1.14) | 26  (14.86) | 41  (23.43) | 44  (25.14) | 62  (35.43) |
| Domain 5 Study Site Management | 3  (1.71) | 11  (6.29) | 30  (17.14) | 56  (32.00) | 75  (42.86) | 3  (1.71) | 25  (14.29) | 42  (24.00) | 62  (35.43) | 43  (24.57) |
| Domain 6 Data Management and Informatics | 3  (1.71) | 7  (4.00) | 24  (13.71) | 57  (32.57) | 84  (48.00) | 2  (1.14) | 20  (11.43) | 33  (18.86) | 73  (41.71) | 47  (26.86) |
| Domain 7 Leadership and Professionalism | 3  (1.71) | 2  (1.14) | 19  (10.86) | 43  (24.57) | 108  (61.71) | 4  (2.29) | 17  (9.71) | 42  (24.00) | 65  (37.14) | 47  (26.86) |
| Domain 8 Communications and Teamwork | 3  (1.71) | 3  (1.71) | 18  (10.29) | 51  (29.14) | 100  (57.14) | 7  (4.00) | 14  (8.00) | 39  (22.29) | 63  (36.00) | 52  (29.71) |

**Table B. Perceived Relevance and Training Needs Among Principal Investigators/Co-Investigators**

|  | Relevance (n)  freq(%) | | | | |  | Training Needs (n)  freq(%) | | | | |
| --- | --- | --- | --- | --- | --- | --- | --- | --- | --- | --- | --- |
| Competency Domains | 1 - Highly Irrelevant | 2 - Likely Irrelevant | 3- More or Less Relevant | 4 - Likely Relevant | 5 - Highly Relevant |  | 1 - Not at all Necessary | 2 - Slightly Necessary | 3-Moderately Necessary | 4 - Very Necessary | 5 Extremely Necessary |
| Domain 1 Scientific Concepts and Research Design | 2  (2.82) | 2  (2.82) | 6  (8.45) | 16  (22.54) | 45  (63.38) |  | 2  (2.82) | 14  (19.72) | 20  (28.17) | 21  (29.58) | 14  (19.72) |
| Domain 2 Ethical and Participant Safety Considerations | 1  (1.41) | 2  (2.82) | 4  (5.63) | 9  (12.68) | 55  (77.46) |  | 2  (2.82) | 16  (22.54) | 16  (22.54) | 21  (29.58) | 16  (22.54) |
| Domain 3 Investigational Products Development and Regulation | 0  (0) | 6  (8.45) | 24  (33.8) | 20  (28.17) | 21  (29.58) |  | 4  (5.63) | 6  (8.45) | 27  (38.03) | 20  (28.17) | 14  (19.72) |
| Domain 4 Clinical Study Operations (Good Clinical Practice) | 0  (0) | 1  (1.41) | 6  (8.45) | 12  (16.9) | 52  (73.24) |  | 2  (2.82) | 14  (19.72) | 16  (22.54) | 14  (19.72) | 25  (35.21) |
| Domain 5 Study and Site Management | 0  (0) | 2  (2.82) | 15  (21.13) | 24  (33.8) | 30  (42.25) |  | 2  (2.82) | 11  (15.49) | 16  (22.54) | 24  (33.8) | 18  (25.35) |
| Domain 6 Data Management and Informatics | 0  (0) | 2  (2.82) | 7  (9.86) | 23  (32.39) | 39  (54.93) |  | 1  (1.41) | 8  (11.27) | 10  (14.08) | 29  (40.85) | 23  (32.39) |
| Domain 7 Leadership and Professionalism | 0  (0) | 0  (0) | 7  (9.86) | 21  (29.58) | 43  (60.56) |  | 1  (1.41) | 9  (12.68) | 16  (22.54) | 26  (36.62) | 19  (26.76) |
| Domain 8 Communications and Teamwork | 0  (0) | 0  (0) | 5  (7.04) | 19  (26.76) | 47  (66.2) |  | 3  (4.23) | 8  (11.27) | 11  (15.49) | 28  (39.44) | 21  (29.58) |

**Table C. Perceived Relevance and Training Needs Among Clinical Research Associate / Monitor**

| n=29 | Relevance (n)  freq(%) | | | | |  | Training Needs (n)  freq(%) | | | | |
| --- | --- | --- | --- | --- | --- | --- | --- | --- | --- | --- | --- |
| Competency Domains | 1 - Highly Irrelevant | 2 - Likely Irrelevant | 3- More or Less Relevant | 4 - Likely Relevant | 5 - Highly Relevant |  | 1 - Not at all Necessary | 2 - Slightly Necessary | 3-Moderately Necessary | 4 - Very Necessary | 5 Extremely Necessary |
| Domain 1 Scientific Concepts and Research Design | 5  (17.24) | 0  (0.00) | 2  (6.90) | 8  (27.59) | 14  (48.28) |  | 0  (0.00) | 1  (3.45) | 4  (13.79) | 18  (62.07) | 6  (20.69) |
| Domain 2 Ethical and Participant Safety Considerations | 2  (6.9) | 1  (3.45) | 1  (3.45) | 7  (24.14) | 18  (62.07) |  | 0  (0) | 1  (3.45) | 12  (41.38) | 7  (24.14) | 9  (31.03) |
| Domain 3 Investigational Products Development and Regulation | 2  (6.9) | 1  (3.45) | 4  (13.79) | 13  (44.83) | 9  (31.03) |  | 0  (0) | 0  (0) | 9  (31.03) | 17  (58.62) | 3  (10.34) |
| Domain 4 Clinical Study Operations (Good Clinical Practice) | 2  (6.9) | 0  (0.0) | 2  (6.9) | 3  (10.34) | 22  (75.86) |  | 0  (0) | 4  (13.79) | 4  (13.79) | 8  (27.59) | 13  (44.83) |
| Domain 5 Study and Site Management | 2  (6.9) | 0  (0.0) | 2  (6.9) | 8  (27.59) | 17  (58.62) |  | 0  (0) | 3  (10.34) | 5  (17.24) | 11  (37.93) | 10  (34.48) |
| Domain 6 Data Management and Informatics | 2  (6.9) | 2  (6.9) | 2  (6.9) | 10  (34.48) | 13  (44.83) |  | 0  (0) | 3  (10.34) | 3  (10.34) | 16  (55.17) | 7  (24.14) |
| Domain 7 Leadership and Professionalism | 2  (6.9) | 0  (0) | 2  (6.9) | 5  (17.24) | 20  (68.97) |  | 0  (0) | 2  (6.9) | 7  (24.14) | 11  (37.93) | 9  (31.03) |
| Domain 8 Communications and Teamwork | 2  (6.9) | 0  (0) | 4  (13.79) | 10  (34.48) | 13  (44.83) |  | 0  (0) | 3  (10.34) | 4  (13.79) | 14  (48.28) | 8  (27.59) |

**Table D. Perceived Relevance and Training Needs Among Project Manager/Research Managers**

| n=19 | Relevance (n)  freq(%) | | | | |  | Training Needs (n)  freq(%) | | | | |
| --- | --- | --- | --- | --- | --- | --- | --- | --- | --- | --- | --- |
| Competency Domains | 1 - Highly Irrelevant | 2 - Likely Irrelevant | 3- More or Less Relevant | 4 - Likely Relevant | 5 - Highly Relevant |  | 1 - Not at all Necessary | 2 - Slightly Necessary | 3-Moderately Necessary | 4 - Very Necessary | 5 Extremely Necessary |
| Domain 1 Scientific Concepts and Research Design | 0  (0.00) | 0  (0.00) | 1  (5.26) | 9  (47.37) | 9  (47.37) |  | 0  (0.00) | 2  (10.53) | 8  (42.11) | 7  (36.84) | 2  (10.53) |
| Domain 2 Ethical and Participant Safety Considerations | 1  (5.26) | 0  (0) | 2  (10.53) | 3  (15.79) | 13  (68.42) |  | 0  (0) | 1  (5.26) | 3  (15.79) | 9  (47.37) | 6  (31.58) |
| Domain 3 Investigational Products Development and Regulation | 0  (0) | 1  (5.26) | 2  (10.53) | 6  (31.58) | 10  (52.63) |  | 0  (0) | 3  (15.79) | 4  (21.05) | 10  (52.63) | 2  (10.53) |
| Domain 4 Clinical Study Operations (Good Clinical Practice) | 0  (0) | 1  (5.26) | 0  (0) | 4  (21.05) | 14  (73.68) |  | 0  (0) | 2  (10.53) | 3  (15.79) | 7  (36.84) | 7  (36.84) |
| Domain 5 Study and Site Management | 0  (0) | 0  (0) | 1  (5.26) | 4  (21.05) | 14  (73.68) |  | 0  (0) | 3  (15.79) | 3  (15.79) | 5  (26.32) | 8  (42.11) |
| Domain 6 Data Management and Informatics | 0  (0) | 0  (0) | 3  (15.79) | 6  (31.58) | 10  (52.63) |  | 0  (0) | 4  (21.05) | 4  (21.05) | 8  (42.11) | 3  (15.79) |
| Domain 7 Leadership and Professionalism | 0  (0) | 0  (0) | 0  (0) | 4  (21.05) | 15  (78.95) |  | 0  (0) | 2  (10.53) | 3  (15.79) | 7  (36.84) | 7  (36.84) |
| Domain 8 Communications and Teamwork | 0  (0) | 0  (0) | 1  (5.26) | 4  (21.05) | 14  (73.68) |  | 0  (0) | 1  (5.26) | 4  (21.05) | 8  (42.11) | 6  (31.58) |

| **Table E: Mean Self-Assessed Competency Rating of Clinical Research Professionals per domain and Years of Experience(SD)** | | | | |
| --- | --- | --- | --- | --- |
| **Domain (N=175)** | **<3 Years**  **(n=45)** | **3 to <6 Years**  **(n=35)** | **6 to <10 Years**  **(n=25)** | **>10 Years**  **(n=70)** |
|
| Domain 1 Scientific Concepts and Research Design | 5.62 | 5.8 | 6.96 | 7.29 |
| (2.42) | (2.36) | (1.97) | (2.53) |
| Domain 2 Ethical and Participant Safety Considerations | 5.95 | 6.66 | 7.96 | 7.84 |
| (2.14) | (2.68) | (1.77) | (2.2) |
| Domain 3 Investigational Products Development and Regulation | 3.89 | 4.31 | 4.96 | 6.17 |
| (2.27) | (2.53) | (3.09) | (2.72) |
| Domain 4 Clinical Study Operations (Good Clinical Practice) | 5.18 | 5.37 | 7.4 | 7.41 |
| (2.4) | (2.4) | (2.02) | (2.45) |
| Domain 5 Study and Site Management | 4.58 | 4.91 | 6.52 | 7.29 |
| (2.21) | (2.69) | (2.55) | (2.59) |
| Domain 6 Data Management and Informatics | 4.96 | 5.49 | 6.48 | 6.67 |
| (2.33) | (2.69) | (2.33) | (2.31) |
| Domain 7 Leadership and Professionalism | 5.64 | 6.89 | 7.48 | 8.19 |
| (2.21) | (2.32) | (2.1) | (1.96) |
| Domain 8 Communications and Teamwork | 5.58 | 6.71 | 6.8 | 7.67 |
| (2.14) | (2.39) | (2.53) | (2.2) |

**Table F. Community Engagement Competency Among Principal Investigator**

| n= 71 | Community Engagement Competency  n  frequency (%) | | | | | | |
| --- | --- | --- | --- | --- | --- | --- | --- |
| Task | 0= No experience | 1 = No level of competence | 2 = Low level of competence | 3 = Average level of competence | 4 =Moderately high level of competence | 5 = High level of competence | NA= Not applicable |
| Takes part in delivering a community engagement plan | 13  (18.3) | 2  (2.8) | 11  (15.5) | 30  (42.2) | 11  (15.5) | 2  (2.8) | 2  (2.8) |
| Takes part in the public promotion of research through giving talks or visiting | 11  (15.5) | 3  (4.2) | 9  (12.7) | 33  (46.5) | 11  (15.5) | 2  (2.8) | 2  (2.8) |
| Encourages contributions and involvement of study participants/patients, key opinion leaders, and community elders or chiefs in all areas of research activity | 12  (16.9) | 0  (0) | 16  (22.5) | 24  (33.8) | 16  (22.5) | 1  (1.4) | 2  (2.8) |
| Plans a community engagement policy for a study, research center, or program | 18  (25.4) | 1  (1.4) | 17  (23.9) | 24  (33.8) | 6  (8.5) | 3  (4.2) | 2  (2.8) |
| Delivers community, or one to one, meetings with community leaders to introduce a study and answer questions | 18  (25.4) | 1  (1.4) | 10  (14.1) | 25  (35.2) | 13  (18.3) | 2  (2.8) | 2  (2.8) |
| Conducts community perception appraisal activities such as interviews and focus group discussions | 16  (22.5) | 0  (0) | 18  (25.4) | 19  (26.8) | 15  (21.1) | 1  (1.4) | 2  (2.8) |
| Designs the approach of introducing a study within a healthcare setting or community | 15  (21.9) | 1  (1.4) | 13  (18.3) | 26  (36.6) | 13  (18.3) | 1  (1.4) | 2  (2.8) |
| Designs and coordinates community sensitization materials or activities (community meetings, educational plans, advertising, leaflets, letters) | 17  (23.9) | 4  (5.6) | 15  (21.1) | 24  (33.8) | 6  (8.4) | 3  (4.2) | 2  (2.8) |
| Sets up and manages a Community Advisory Board | 28  (39.4) | 5  (7.0) | 17  (23.9) | 15  (21.1) | 4  (5.6) | 0  (0) | 2  (2.8) |
| Sets up a network within the community to facilitate ongoing engagement | 24  (33.8) | 3  (4.22) | 19  (26.8) | 16  (22.5) | 6  (8.4) | 1  (1.4) | 2  (2.8) |

**Table G. Applying for Research Funding Competency Among Investigators**

|  | Self-assessed competency on Attracting Research Funding Competency, n=71 (%) | | | | | | |
| --- | --- | --- | --- | --- | --- | --- | --- |
|  | 0= No experience | 1 = No level of competence | 2 = Low level of competence | 3 = Average level of competence | 4 = Moderately high level of competence | 5 = High level of competence | NA= Not applicable |
| Plans costings and resources for a study or a grant application | 5  (7.0) | 3  (5.0) | 12  (16.0) | 24  (33.8) | 22  (31.0) | 5  (7.0) | 0  (0.0) |
| Writes and submits grant applications for a study | 6  (8.5) | 2  (2.8) | 11  (15.5) | 29  (40.8) | 15  (21.1) | 8  (11.3) | 0  (0.0) |
| Contributes to the writing of grant applications | 6  (8.5) | 3  (4.2) | 8  (11.3) | 23  (32.4) | 23  (32.4) | 8  (11.3) | 0  (0.0) |
| Writes and submits grant applications for significant research projects or program | 8  (11.3) | 4  (5.6) | 9  (12.7) | 28  (39.4) | 17  (24.0) | 4  (5.6) | 1  (1.4) |
